# Supplementary material for: Effect of Network Architecture on Synchronization and Entrainment Properties of the Circadian Oscillations in the Suprachiasmatic Nucleus
Source: PLOS journal article supplement (doi:10.1371/journal.pcbi.1002419), 2012-03-08

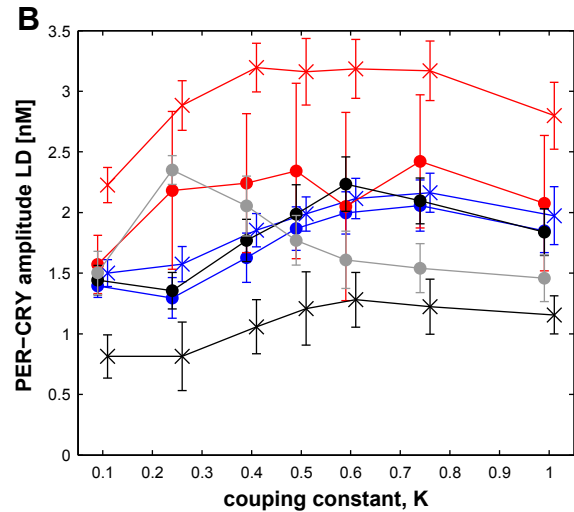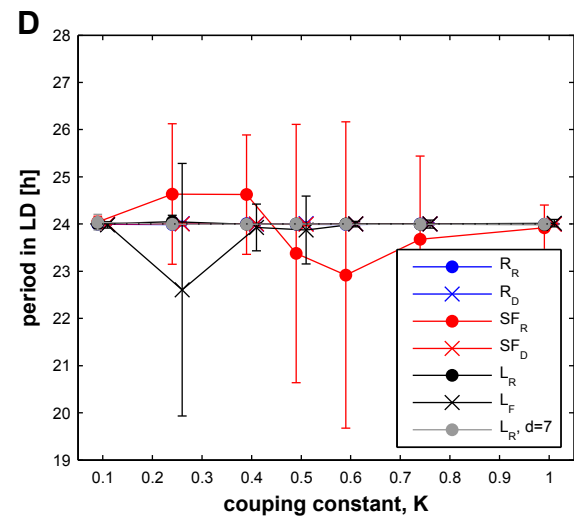

Supplement: S4 (10.1371/journal.pcbi.1002419.s004) [file journal.pcbi.1002419.s004]
