# Supplementary material for: Effect of Network Architecture on Synchronization and Entrainment Properties of the Circadian Oscillations in the Suprachiasmatic Nucleus
Source: PLOS journal article supplement (doi:10.1371/journal.pcbi.1002419), 2012-03-08

**A****DD conditions****Cells**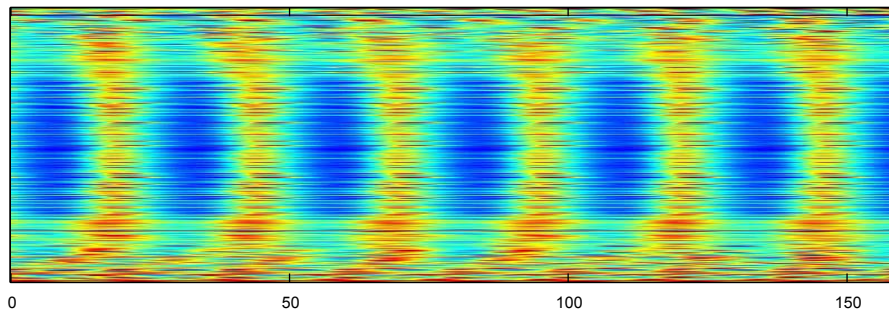**B****LD conditions****Cells**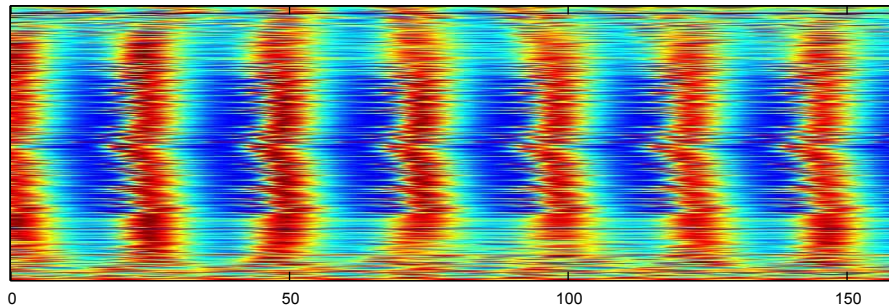**time [h]**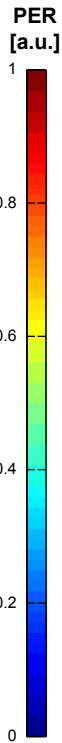

Supplement: S13 (10.1371/journal.pcbi.1002419.s013) [file journal.pcbi.1002419.s013]
